# Supplementary material for: Epithelial-to-mesenchymal transition leads to disease-stage differences in circulating tumor cell detection and metastasis in pre-clinical models of prostate cancer
Source: PubMed Central journal article supplement (PMC5342801; doi:10.18632/oncotarget.12682), 2016-10-15
Supplement: oncotarget-07-76125-s001.pdf [file oncotarget-07-76125-s001.pdf]

## Epithelial-to-mesenchymal transition leads to disease-stage differences in circulating tumor cell detection and metastasis in pre-clinical models of prostate cancer

### SUPPLEMENTARY FIGURES AND TABLES

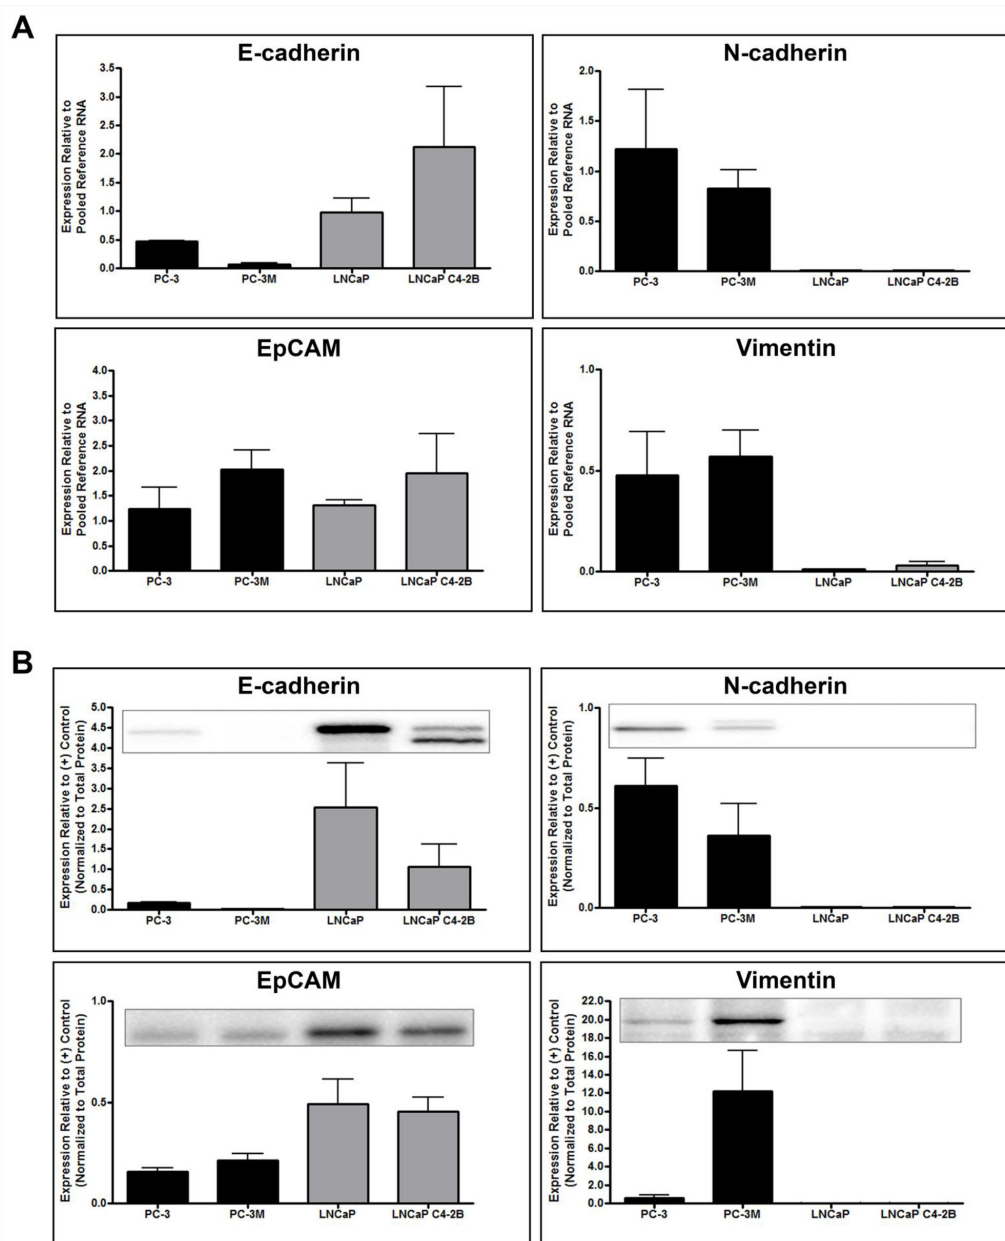

**Supplementary Figure S1: Human prostate cancer cell lines display differences in epithelial-to-mesenchymal transition (EMT) phenotype at the RNA and protein level. A-B.** The expression of epithelial-associated markers E-cadherin and EpCAM and mesenchymal-associated markers N-cadherin and vimentin is associated with previously reported cell aggressiveness and *in vivo* metastatic capacity of the human prostate cancer cell lines PC-3, PC-3M (black bars), LNCaP and LNCaP C4-2B (grey bars). (A) RT-qPCR analysis of mRNA expression; data presented as relative expression (mean  $\pm$  SEM) compared to pooled reference RNA (n=3). (B) Immunoblot analysis of protein expression; presented as quantitative densitometric data (mean  $\pm$  SEM) relative to appropriate positive control cell lines and normalized to total protein loaded as assessed by amido black staining, and as representative immunoblots shown as cropped gel images (n=3).

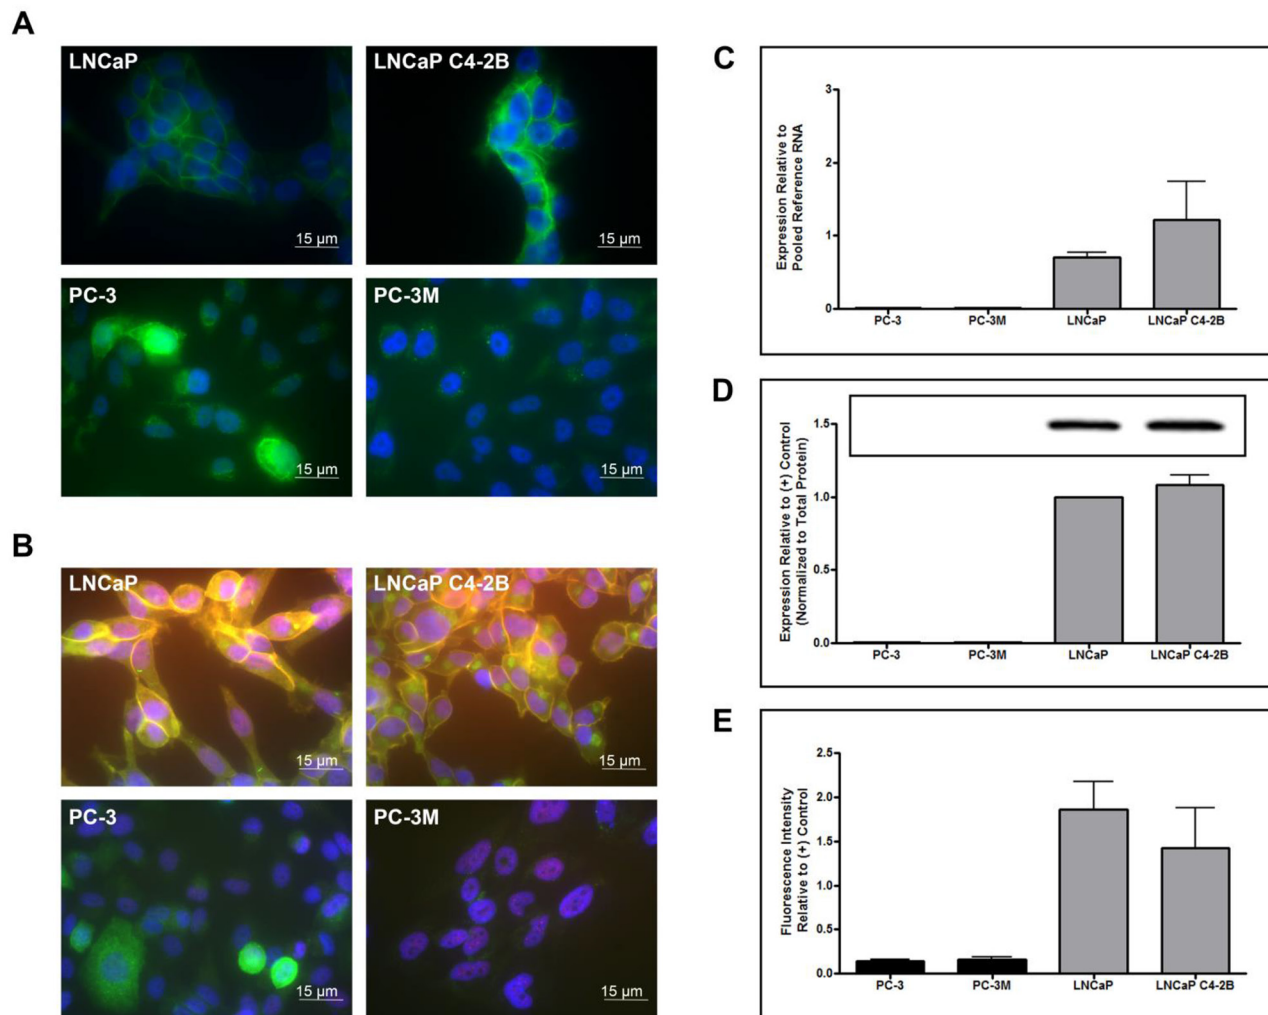

**Supplementary Figure S2: E-cadherin cell membrane localization is aberrant in human prostate cancer cell lines that do not express  $\alpha$ -catenin.** **A.** Representative immunofluorescent images of E-cadherin (*green*) and DAPI (*blue*) stained PC-3, PC-3M, LNCaP, and LNCaP C4-2B cell lines cultured on glass chamber slides. **B.** Representative immunofluorescent images of co-localization (*yellow*) of E-cadherin (*green*) and  $\alpha$ -catenin (*red*) in PC-3, PC-3M, LNCaP, and LNCaP C4-2B cell lines cultured on glass chamber slides (DAPI [blue]). Images were obtained at 60x magnification, scale bars = 15  $\mu$ m (n=3). **C.** RT-qPCR analysis of mRNA; data presented as relative expression (mean  $\pm$  SEM) compared to pooled reference RNA (n=3). **D.** Immunoblot analysis of protein expression; presented as quantitative densitometric data (mean  $\pm$  SEM) relative to an appropriate positive control cell line and as a representative immunoblot, shown as a cropped gel image (n=3). **E.** Flow cytometry analysis; presented as relative fluorescence intensity (expression; mean  $\pm$  SEM) compared to an appropriate positive control cell line (n=3).

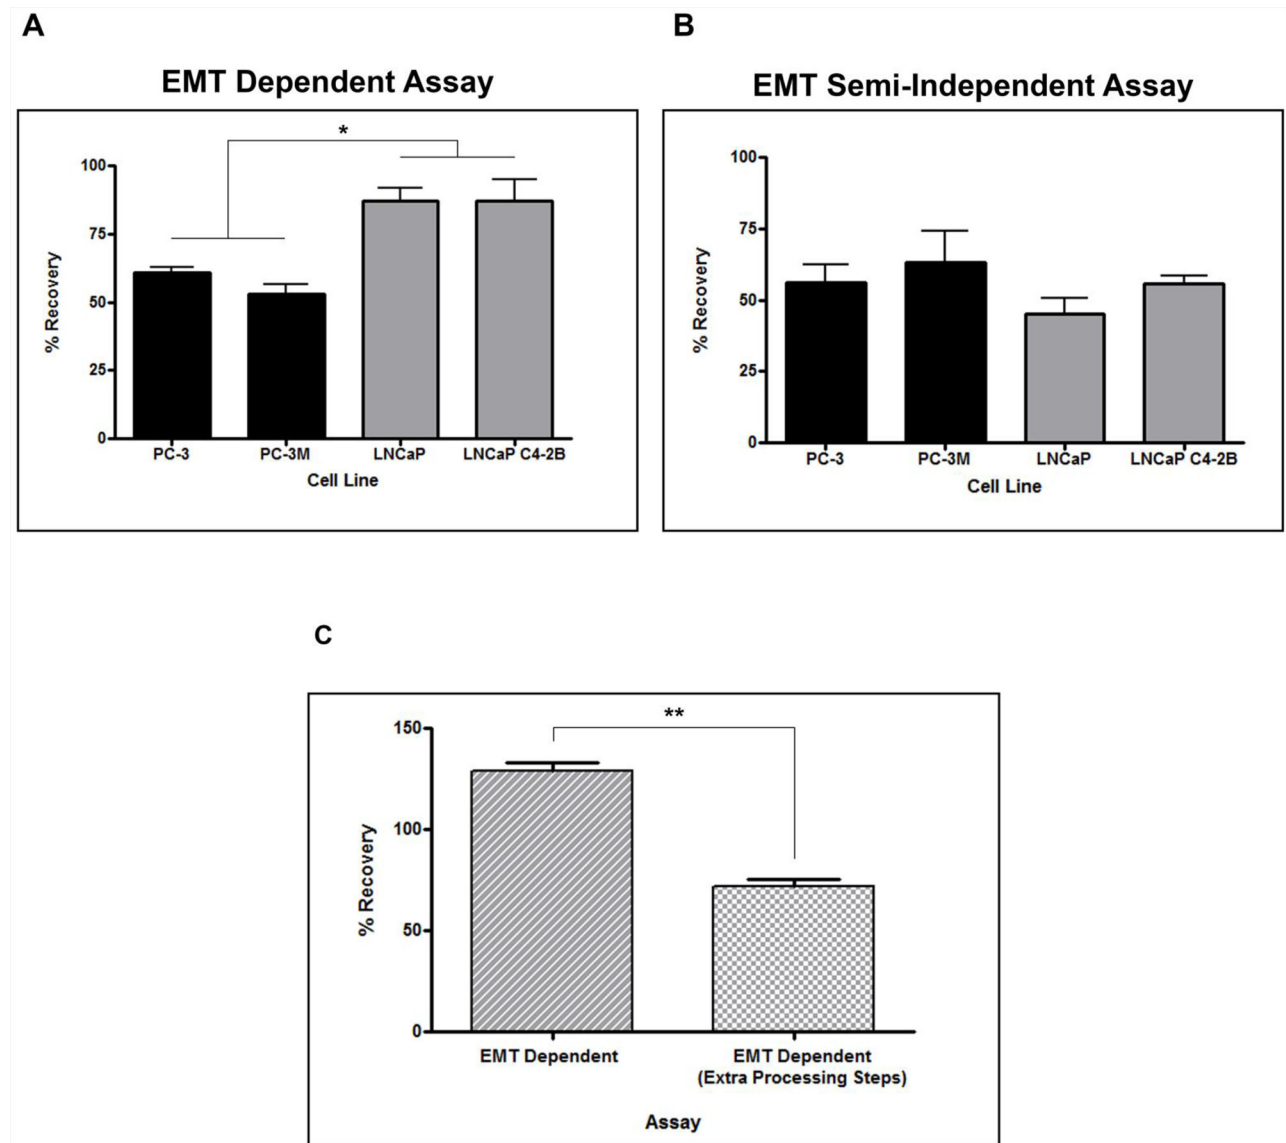

**Supplementary Figure S3: CTC recovery using the CellSearch® system is reduced in human prostate cancer cells with a mesenchymal phenotype.** Prostate cancer cells were counted by hemocytometer and spiked at a concentration of 1,000 tumor cells/50 $\mu$ l of whole mouse blood. 50 $\mu$ l of mouse blood was subsequently processed using 1 of 2 mouse-adapted protocols and CTC recovery was measured as a percentage recovery of the number of spiked cells. **A.** CTC recovery using the EMT-dependent assay is significantly lower in cells with a more mesenchymal and metastatic phenotype. **B.** CTC recovery using the EMT semi-independent assay is lower relative to the EMT dependent assay. However, equivalent recovery is observed across all 4 cell lines regardless of EMT phenotype. **C.** Reduced recovery observed when using the EMT semi-independent assay was further investigated and determined to be as a result of extra processing steps required in this protocol. Data are presented as the mean  $\pm$  SEM (n=3). Analysis of differences in CTC recovery using the 2 assays was performed using 1-way ANOVA with Tukey's post-test for multiple comparisons. \* = significantly different ( $p \leq 0.05$ ).

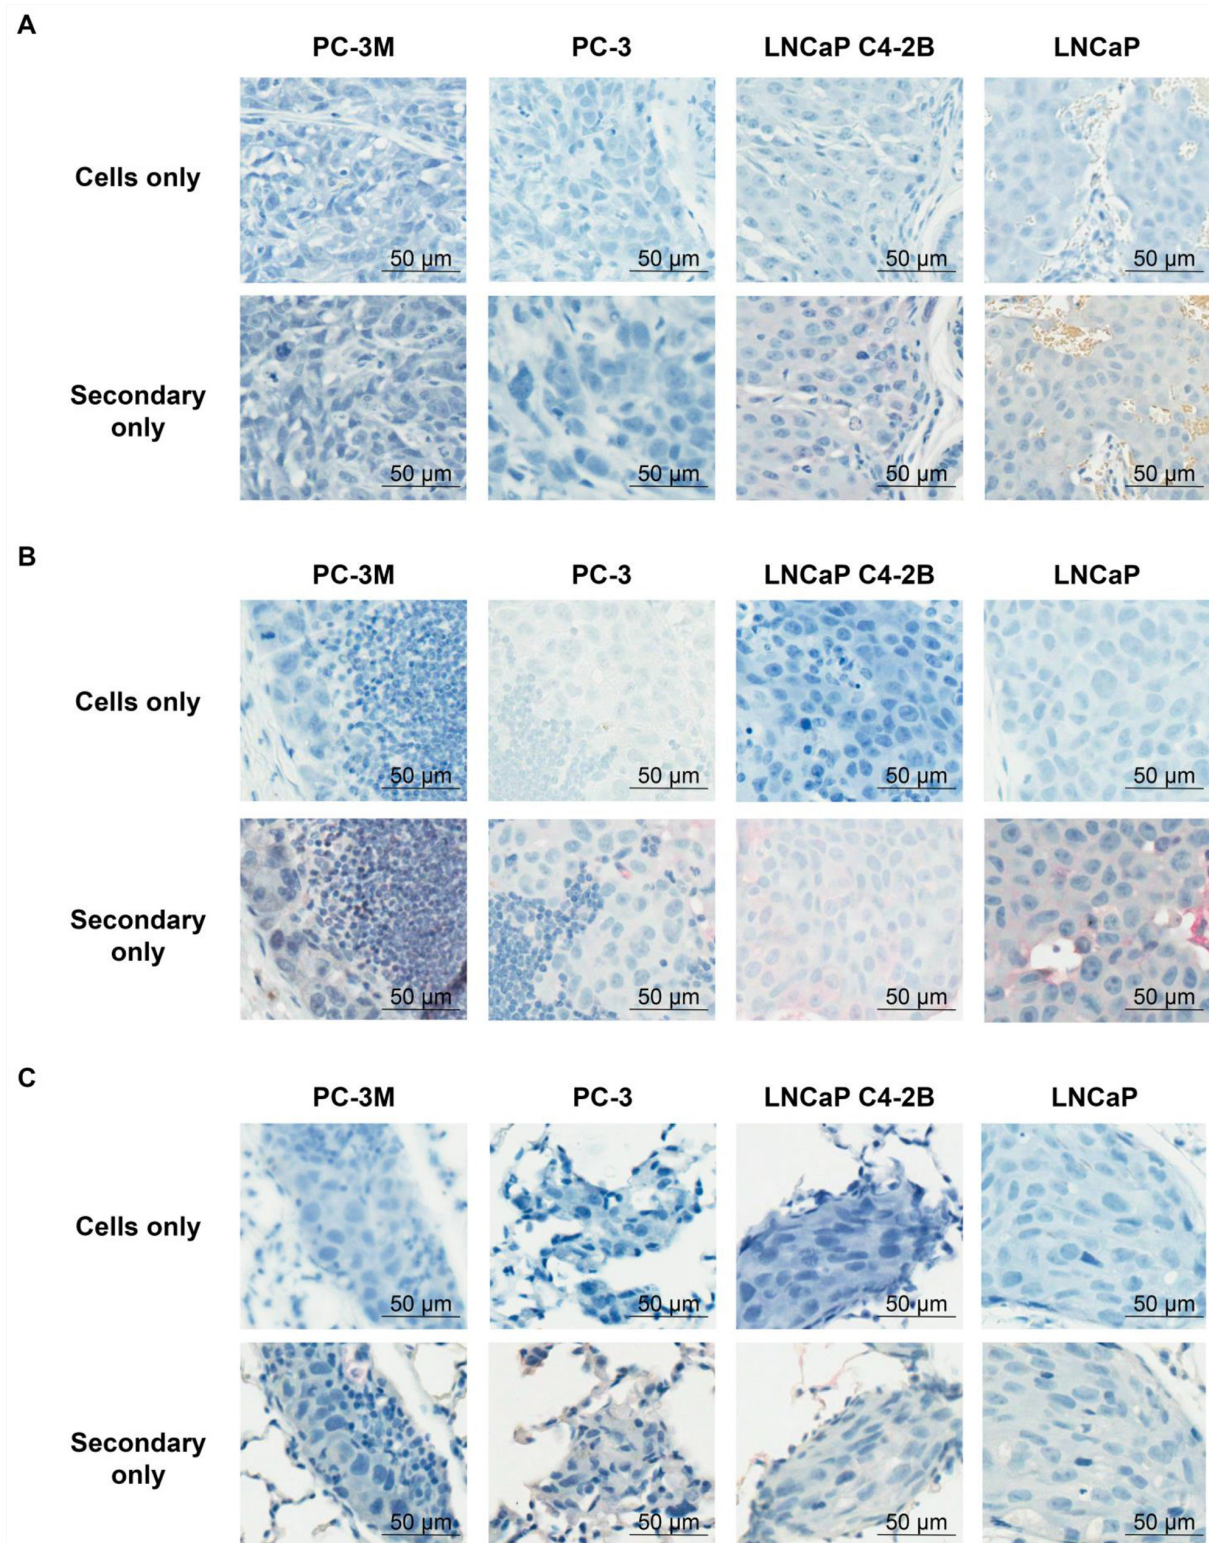

**Supplementary Figure S4: Cells only and secondary antibody controls for IHC.** Cells only and secondary only controls for IHC performed on **A.** primary tumors, **B.** lymph node metastases, and **C.** lung metastases. Histological sections are presented at 40x magnification. Scale bars=50  $\mu$ m.



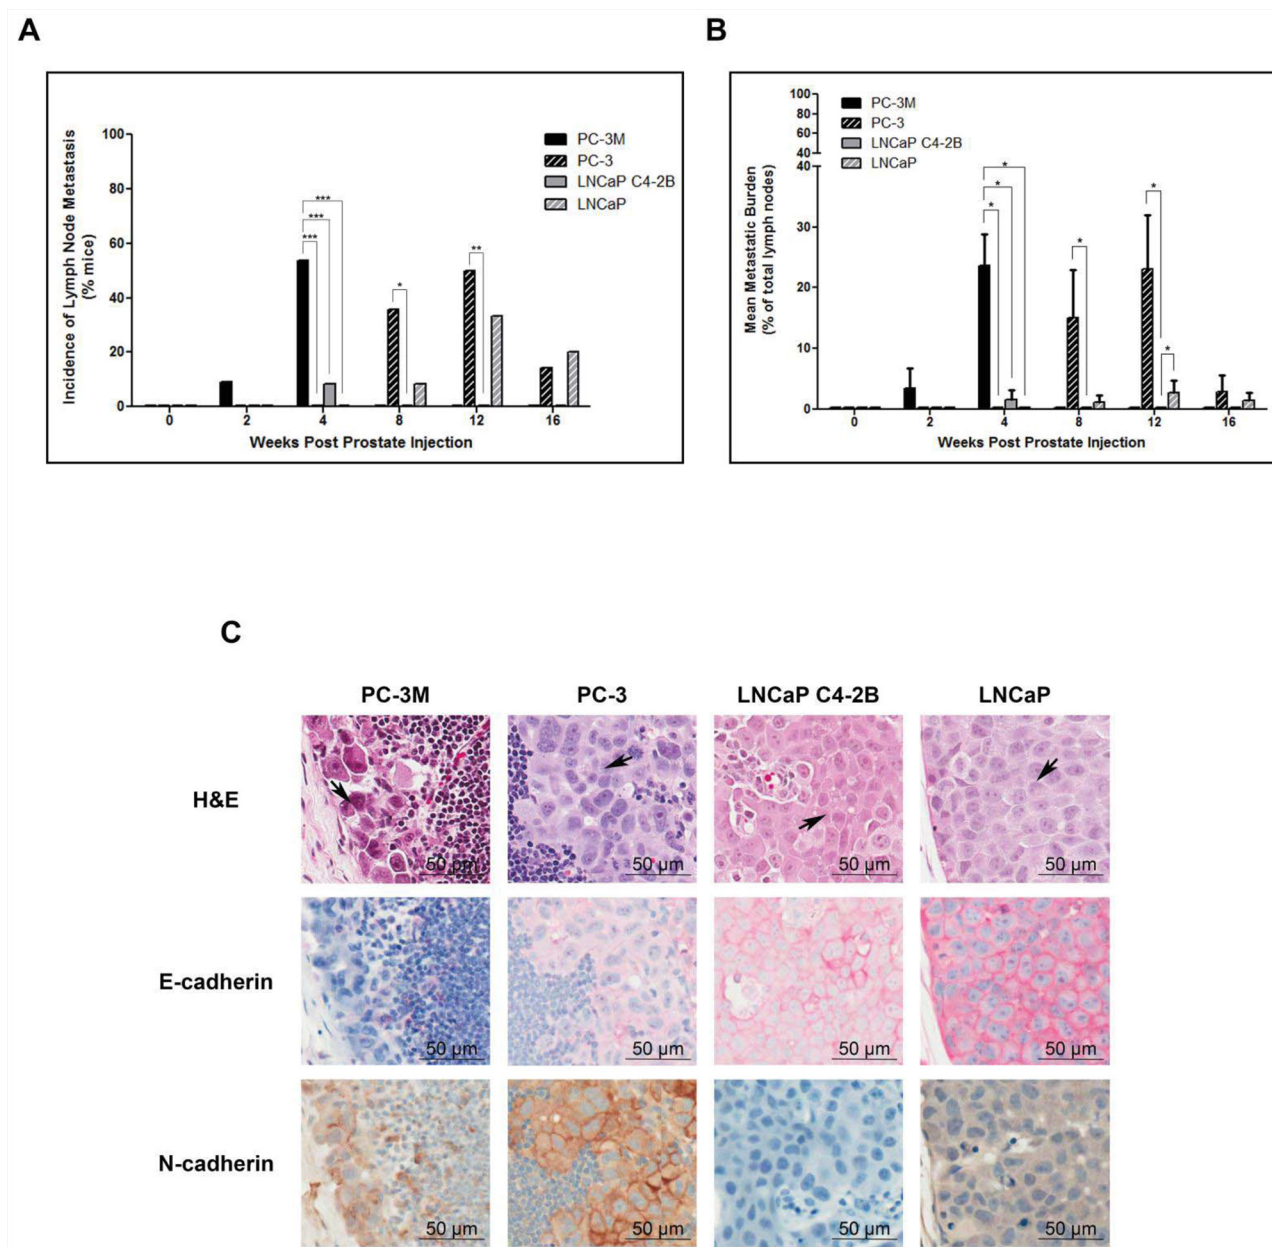

**Supplementary Figure S5: The mesenchymal PC-3M and PC-3 cell lines exhibit a greater incidence of lymph node metastases and mean lymph node metastatic burden.** **A.** Incidence of lymph node metastasis in mice injected with PC-3M, PC-3, LNCaP C4-2B, and LNCaP prostate cancer cell lines based on microscopic histological examination of formalin fixed, H&E stained tissue following orthotopic injection. Data are presented as the percentage of mice per cell line per timepoint with detectable lymph node metastases (n=7-39 mice/group). **B.** Quantitative analysis of tumor burden (mean % of lymph nodes occupied by tumor) following orthotopic injection of prostate cancer cell lines. Data are presented as the mean ± SEM (n=7-39 mice/group). Differences in the incidence of lymph node metastasis were assessed using Fisher’s Exact Test. Differences in metastatic burden to the lymph nodes were assessed by Wilcoxon Score followed by a Kruskal-Wallis test. \* = significantly different (p≤0.05). **C.** Representative H&E and IHC (E-cadherin and N-cadherin) images of lymph node metastases for each investigated cell line. Histological sections are presented at 40x magnification. Arrowheads on H&E images indicate regions of tumor within the given tissue. Scale bars=50 μm.

**Supplementary Table S1: Forward and reverse primers used for qPCR analysis**

| Target Gene       | Forward Primer (5' → 3') | Reverse Primer (5' → 3') |
|-------------------|--------------------------|--------------------------|
| E-cadherin        | TGCTGATGCCCCCAATACCCCA   | GTGATTTCCTGGCCCACGCCAA   |
| N-cadherin        | TGACTCCAACGGGGACTGCACA   | AGCTCAAGGACCCAGCAGTGGGA  |
| EpCAM             | CGACTTTTGCCCGCAGCTCAGGA  | GGGCCCCCTTCAGGTTTTGCTCT  |
| Vimentin          | AACCAACGACAAAGCCCGCGTC   | TTCCGGTTGGCAGCCTCAGAGA   |
| $\alpha$ -catenin | CCACGTTTTACTGAGCAAGT     | AGTCAGAGTCATCCAACCTCC    |
| GAPDH             | TCCATGGCACCGTCAAGGCTGA   | GCCAGCATCGCCCCACTTGATT   |

Sequence specific primers were designed based on gene sequence information from the National Center for Biotechnology Information (NCBI; Bethesda, MD).

**Supplementary Table S2: Anti-human antibodies used for immunoblot analysis**

| Target Protein    | Clone         | Commercial Source | 1° Ab Host | kDa | 1° Ab Conditions        |
|-------------------|---------------|-------------------|------------|-----|-------------------------|
| N-Cadherin        | EPR1791-4     | Abcam             | Rabbit     | 100 | 1:1,000<br>(1 hr @ RT)  |
| E-Cadherin        | 36/E-cadherin | BD Biosciences    | Mouse      | 120 | 1:20,000<br>(1 hr @ RT) |
| Vimentin          | V9            | Millipore         | Mouse      | 60  | 1:1,000<br>(1 hr @ RT)  |
| EpCAM             | E144          | Abcam             | Rabbit     | 39  | 1:1,000<br>(1 hr @ RT)  |
| $\alpha$ -catenin | EP1793Y       | Abcam             | Rabbit     | 100 | 1:50,000<br>(1 hr @ RT) |
| $\beta$ -Actin    | Polyclonal    | Sigma             | Rabbit     | 42  | 1:5,000<br>(1 hr @ RT)  |

**Supplementary Table S3: Anti-human antibodies used for flow cytometry analysis**

| Target Protein    | Clone         | Commercial Source                   | 1° Ab Amount per $5 \times 10^5$ cells |
|-------------------|---------------|-------------------------------------|----------------------------------------|
| N-Cadherin        | EPR1791-4     | Abcam                               | 0.40 $\mu$ g                           |
| E-Cadherin        | 36/E-cadherin | BD Biosciences                      | 0.80 $\mu$ g                           |
| Vimentin          | V9            | Millipore                           | 0.80 $\mu$ g                           |
| EpCAM             | E144          | Abcam                               | 0.15 $\mu$ g                           |
| $\alpha$ -catenin | EP1793Y       | Abcam                               | 0.35 $\mu$ g                           |
| CK 8/18/19        | Polyclonal    | Janssen Diagnostics<br>(CellSearch) | 100 $\mu$ l                            |
